# Supplementary material for: Directed Evolution of Near-Infrared Serotonin Nanosensors with Machine Learning-Based Screening
Source: MDPI journal article supplement (doi:10.3390/nano14030247), 2024-01-23
Supplement: s1 [file s1]

# Directed Evolution of Near-Infrared Serotonin Nanosensors with Machine Learning-Based Screening

Seonghyeon An <sup>1,†</sup>, Yeongjoo Suh <sup>1,†</sup>, Payam Kelich <sup>2</sup>, Dakyeon Lee <sup>1,3</sup>, Lela Vukovic <sup>2</sup> and Sanghwa Jeong <sup>1,\*</sup>

<sup>1</sup> Department of Biomedical Convergence Engineering, Pusan National University, Yangsan 50612, Republic of Korea  
<sup>2</sup> Department of Chemistry and Biochemistry, University of Texas at El Paso, El Paso, TX 79968, USA  
<sup>3</sup> Department of Chemistry, Pohang University of Science and Technology (POSTECH), Pohang 37673, Republic of Korea  
\* Correspondence: sanghwa.jeong@pusan.ac.kr; Tel.: +82-51-510-8539  
† These authors contributed equally to this work.

a.

| Sequence ID | DNA sequence (from 5' to 3')  | Predicted $\Delta F/F_0$ | Sequence ID | DNA sequence (from 5' to 3')    | Predicted $\Delta F/F_0$ |
|-------------|-------------------------------|--------------------------|-------------|---------------------------------|--------------------------|
| 1           | CCCCCAGCCCCAACACAACCAACTCCCCC | 1.533                    | 11          | CCCCCAGCCCCAACACCACCAAGCTCCCCC  | 1.456                    |
| 2           | CCCCCAGCCCTACACAACCAAGCTCCCCC | 1.491                    | 12          | CCCCCAGCCCCGACACAACCAACTCCCCC   | 1.451                    |
| 3           | CCCCCAGCCCTACACAACCAACTCCCCC  | 1.480                    | 13          | CCCCCAGCCCTACACAACCAACTCCCCC    | 1.449                    |
| 4           | CCCCCAGCCCTACACAACCAAGCCCCC   | 1.479                    | 14          | CCCCCAGCAGTACACAACCAACTCCCCC    | 1.448                    |
| 5           | CCCCCAGCCCTACACAATCCAAGTCCCCC | 1.469                    | 15          | CCCCCAGCCCATCACAACCAAGCCCCC     | 1.447                    |
| 6           | CCCCCAGCCCTACCCAACCAACTCCCCC  | 1.468                    | 16          | CCCCCAGCCCTAACACAACCAACTCCCCC   | 1.444                    |
| 7           | CCCCCAACCCCTACACAACCAACTCCCCC | 1.467                    | 17          | CCCCCAGCCCATCACAACCAAGCTCCCCC   | 1.442                    |
| 8           | CCCCCAGGCCCTACACAACCAACTCCCCC | 1.466                    | 18          | CCCCCAGCCCTACACAACAACCAACTCCCCC | 1.441                    |
| 9           | CCCCCAGCCCCAACACCACCACTCCCCC  | 1.463                    | 19          | CCCCCAGCCCCAACACGACCAACTCCCCC   | 1.440                    |
| 10          | CCCCCAGCCCTAGACAACCAACTCCCCC  | 1.458                    | 20          | CCCCCAGCCCTACACAACCAACCCCCC     | 1.439                    |

b.

| Sequence ID | DNA sequence (from 5' to 3')  | Predicted $\Delta F/F_0$ | Sequence ID | DNA sequence (from 5' to 3')    | Predicted $\Delta F/F_0$ |
|-------------|-------------------------------|--------------------------|-------------|---------------------------------|--------------------------|
| 1           | CCCCCAGCCCCAACACAACCAACTCCCCC | 1.533                    | 11          | CCCCCAGCCCCAACACCACCAAGCTCCCCC  | 1.456                    |
| 2           | CCCCCAGCCCTACACAACCAAGCTCCCCC | 1.491                    | 12          | CCCCCAGCCCCGACACAACCAACTCCCCC   | 1.451                    |
| 3           | CCCCCAGCCCTACACAACCAACTCCCCC  | 1.480                    | 13          | CCCCCAGCCCTACACAACCAACTCCCCC    | 1.449                    |
| 4           | CCCCCAGCCCTACACAACCAAGCCCCC   | 1.479                    | 14          | CCCCCAGCAGTACACAACCAACTCCCCC    | 1.448                    |
| 5           | CCCCCAGCCCTACACAATCCAAGTCCCCC | 1.469                    | 15          | CCCCCAGCCCATCACAACCAAGCCCCC     | 1.447                    |
| 6           | CCCCCAGCCCTACCCAACCAACTCCCCC  | 1.468                    | 16          | CCCCCAGCCCTAACACAACCAACTCCCCC   | 1.444                    |
| 7           | CCCCCAACCCCTACACAACCAACTCCCCC | 1.467                    | 17          | CCCCCAGCCCATCACAACCAAGCTCCCCC   | 1.442                    |
| 8           | CCCCCAGGCCCTACACAACCAACTCCCCC | 1.466                    | 18          | CCCCCAGCCCTACACAACAACCAACTCCCCC | 1.441                    |
| 9           | CCCCCAGCCCCAACACCACCACTCCCCC  | 1.463                    | 19          | CCCCCAGCCCCAACACGACCAACTCCCCC   | 1.440                    |
| 10          | CCCCCAGCCCTAGACAACCAACTCCCCC  | 1.458                    | 20          | CCCCCAGCCCTACACAACCAACCCCCC     | 1.439                    |

c.

| Sequence ID | DNA sequence (from 5' to 3')  | Predicted $\Delta F/F_0$ | Sequence ID | DNA sequence (from 5' to 3')    | Predicted $\Delta F/F_0$ |
|-------------|-------------------------------|--------------------------|-------------|---------------------------------|--------------------------|
| 1           | CCCCCAGCCCCAACACAACCAACTCCCCC | 1.533                    | 11          | CCCCCAGCCCCAACACCACCAAGCTCCCCC  | 1.456                    |
| 2           | CCCCCAGCCCTACACAACCAAGCTCCCCC | 1.491                    | 12          | CCCCCAGCCCCGACACAACCAACTCCCCC   | 1.451                    |
| 3           | CCCCCAGCCCTACACAACCAACTCCCCC  | 1.480                    | 13          | CCCCCAGCCCTACACAACCAACTCCCCC    | 1.449                    |
| 4           | CCCCCAGCCCTACACAACCAAGCCCCC   | 1.479                    | 14          | CCCCCAGCAGTACACAACCAACTCCCCC    | 1.448                    |
| 5           | CCCCCAGCCCTACACAATCCAAGTCCCCC | 1.469                    | 15          | CCCCCAGCCCATCACAACCAAGCCCCC     | 1.447                    |
| 6           | CCCCCAGCCCTACCCAACCAACTCCCCC  | 1.468                    | 16          | CCCCCAGCCCTAACACAACCAACTCCCCC   | 1.444                    |
| 7           | CCCCCAACCCCTACACAACCAACTCCCCC | 1.467                    | 17          | CCCCCAGCCCATCACAACCAAGCTCCCCC   | 1.442                    |
| 8           | CCCCCAGGCCCTACACAACCAACTCCCCC | 1.466                    | 18          | CCCCCAGCCCTACACAACAACCAACTCCCCC | 1.441                    |
| 9           | CCCCCAGCCCCAACACCACCACTCCCCC  | 1.463                    | 19          | CCCCCAGCCCCAACACGACCAACTCCCCC   | 1.440                    |
| 10          | CCCCCAGCCCTAGACAACCAACTCCCCC  | 1.458                    | 20          | CCCCCAGCCCTACACAACCAACCCCCC     | 1.439                    |

d.

| Sequence ID | DNA sequence (from 5' to 3') | Predicted $\Delta F/F_0$ | Sequence ID | DNA sequence (from 5' to 3') | Predicted $\Delta F/F_0$ |
|-------------|------------------------------|--------------------------|-------------|------------------------------|--------------------------|
| 1           | CCCCCAACACAAACAACCACTCCCCC   | 1.498                    | 11          | CCCCCAGCACTACCCAACCACTCCCCC  | 1.395                    |
| 2           | CCCCCAGCACAAACAACCACTCCCCC   | 1.482                    | 12          | CCCCCAACTACACAAGCACTCCCCC    | 1.394                    |
| 3           | CCCCCAGCACAAACAACCACTCCCCC   | 1.455                    | 13          | CCCCCAACTACACAACCACTCCCCC    | 1.394                    |
| 4           | CCCCCAACTACTCCAACCACTCCCCC   | 1.453                    | 14          | CCCCCGAAGCTACACAACCACTCCCCC  | 1.390                    |
| 5           | CCCCCAGCACAAACAAGCACTCCCCC   | 1.443                    | 15          | CCCCCAACTACACGACCACTCCCCC    | 1.387                    |
| 6           | CCCCCAACGCTACACAACCACTCCCCC  | 1.422                    | 16          | CCCCCAGCGTACACAACCACTCCCCC   | 1.381                    |
| 7           | CCCCCAACTACACAACCACTCCCCC    | 1.420                    | 17          | CCCCCGGCACTACACAACCACTCCCCC  | 1.367                    |
| 8           | CCCCCAGCACAAACTACCACTCCCCC   | 1.411                    | 18          | CCCCCAGCACTACACGACCACTCCCCC  | 1.366                    |
| 9           | CCCCCAGCACAAACCACTCCCCC      | 1.403                    | 19          | CCCCCAGCACAAACCACTCCCCC      | 1.362                    |
| 10          | CCCCCAACTACACAACCACTCCCCC    | 1.395                    | 20          | CCCCCAGGACTACACCACTCCCCC     | 1.361                    |

**Figure S1.** The table shows the top 20 sequences in each round of machine learning and the predicted machine learning results. The predicted  $\Delta F/F_0$  is the predicted value of how well the sequence responds to serotonin at 1195 nm. For the original sequence in each round, the positions where 3 base mutations occurred and the results are coloured in red. **(a)** Table for round 1 of sensitivity, selectivity. **(b)** Table for round 2 of sensitivity. **(c)** Table for round 3 of sensitivity. **(d)** Table for round 2 of selectivity.

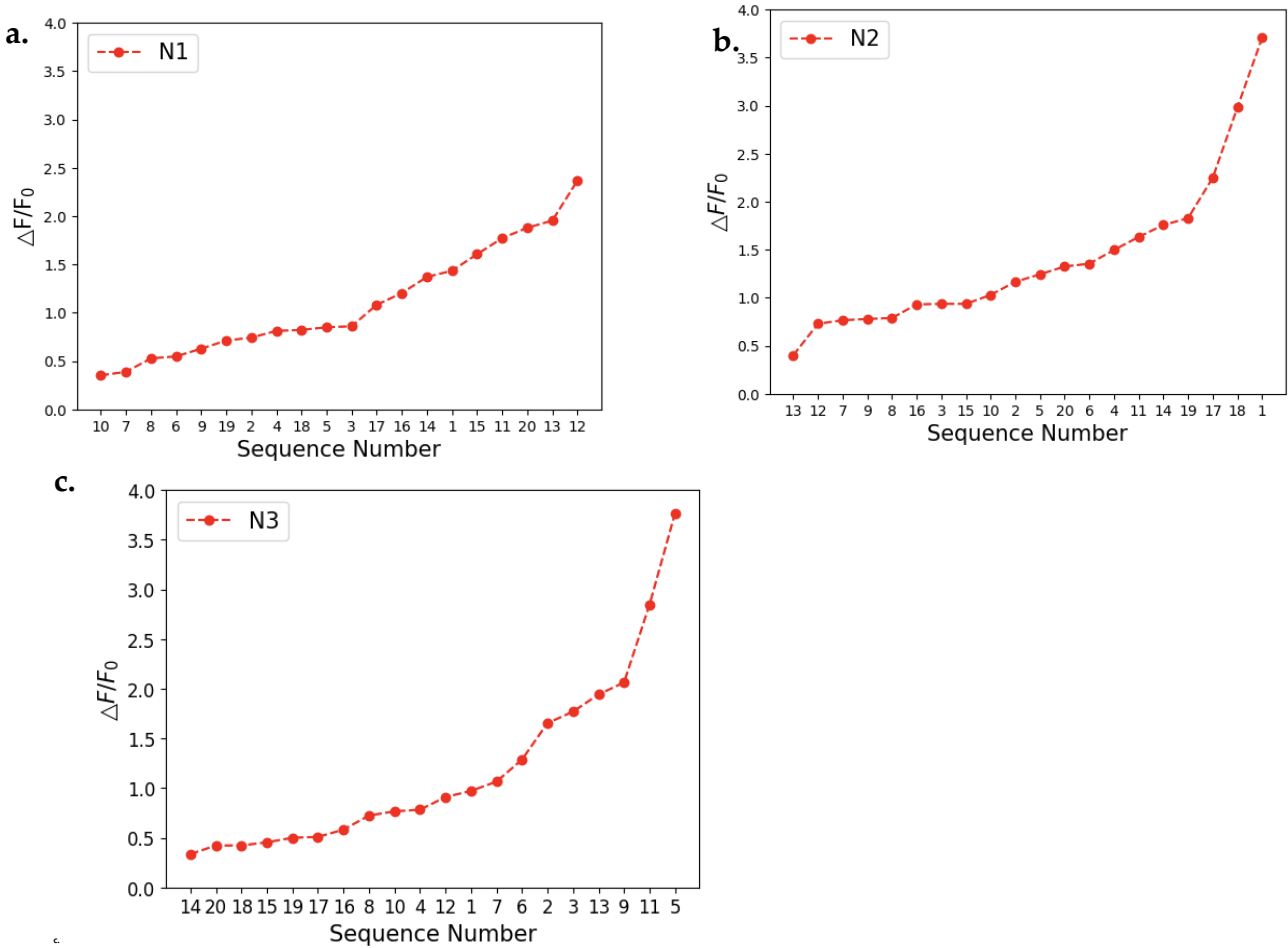

**Figure S2.** The  $\Delta F/F_0$  values of the top 20 sequences for each round in sensitivity, sorted in ascending order. **(a)** The best performing sequence in round N1 is N1-12, with a  $\Delta F/F_0$  of 2.366. **(b)** The best performing sequence N2-1 with a  $\Delta F/F_0$  of 3.705. The second best performing sequence, N2-18, has a  $\Delta F/F_0$  of 2.981, which is better than N1-12. **(c)** The best performing sequence N3-5 with a  $\Delta F/F_0$  of 3.765.

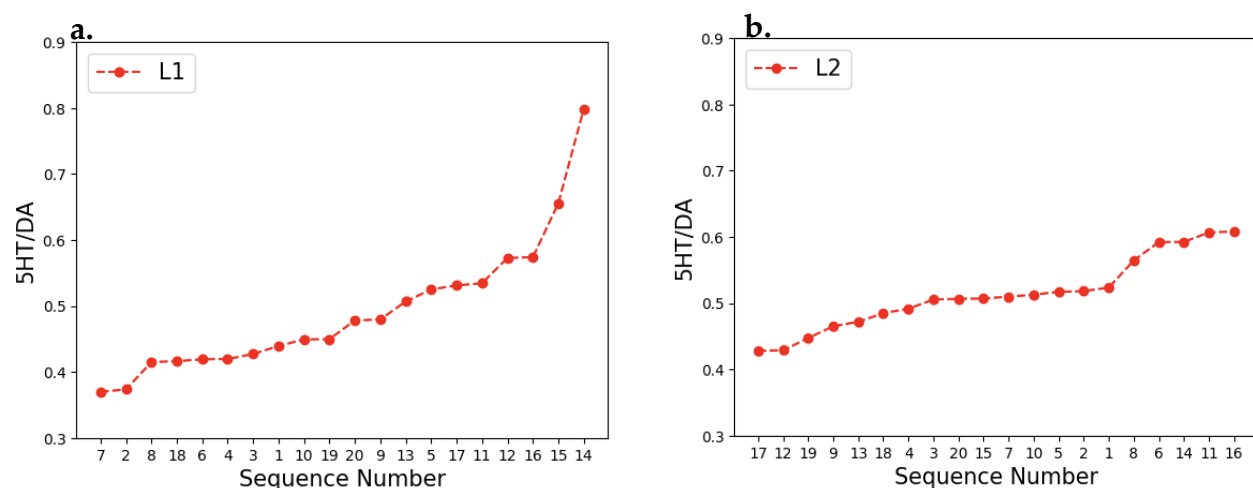

**Figure S3.** The 5HT/DA values of the top 20 sequences for each round in selectivity, sorted in ascending order. **(a)** The best performing sequence in the L1 round, L1-14, has a value of 0.799, while the second best performing sequence, L1-15, has a 5HT/DA value of 0.655. **(b)** The best performing sequence in the L2 round, L2-16, has a 5HT/DA value of 0.608. The 5HT/DA values of the remaining sequences are distributed between 0.4 and 0.6, and L2-16 has a value smaller than the 5HT/DA value of L1-15, which is 0.655, indicating that it was saturated in the L1 round.
